# Supplementary material
Source: Springer Nature journal article supplement (https://www.springermedizin.de/resource/supplementary/13063_2010_534_MOESM1_ESM.pdf/9618180)
Supplement: MOESM1 [file 9618180]

Preliminary  
examina-  
tion

Next patient to be screened  
at the institution

Preliminary  
examination:  
tentative diagnosis of  
psychotic disorder?

no

No further activity

yes

Registration of patient /  
screening form  
Check of the „facile“ eligibility  
criteria: age, foreign  
language, travel time,  
addictive disorder as primary  
clinical focus, ongoing  
psychotherapy, mental  
retardation

Exclusion criterion  
fulfilled?

yes

No inclusion,  
final documentation

no

Screening
